# Supplementary material for: Rational design of MnO2@MnO2 hierarchical nanomaterials and their catalytic activities
Source: Royal Society of Chemistry journal article supplement (doi:10.1039/c6dt03523j), 2016-01-01
Supplement: c6dt03523j1.pdf [file c6dt03523j1.pdf]

## Supplementary Information

### CONTENTS

|                |                                                                                          |       |
|----------------|------------------------------------------------------------------------------------------|-------|
| <b>Fig. S1</b> | SEM images of $\alpha$ -MnO <sub>2</sub> nanowire.....                                   | Page2 |
| Fig.S2         | Mn2p of the core/shell MnO <sub>2</sub> @MnO <sub>2</sub> .....                          | Page2 |
| Fig.S3         | the catalytic combustion activity of $\alpha$ -MnO <sub>2</sub> nanowire.....            | Page3 |
| Fig.S4         | TPR result of the MnO <sub>2</sub> @ MnO <sub>2</sub> and MnO <sub>2</sub> nanowire..... | Page3 |
| Table S1       | Some of the reported catalysts for DME combustion.....                                   | Page4 |

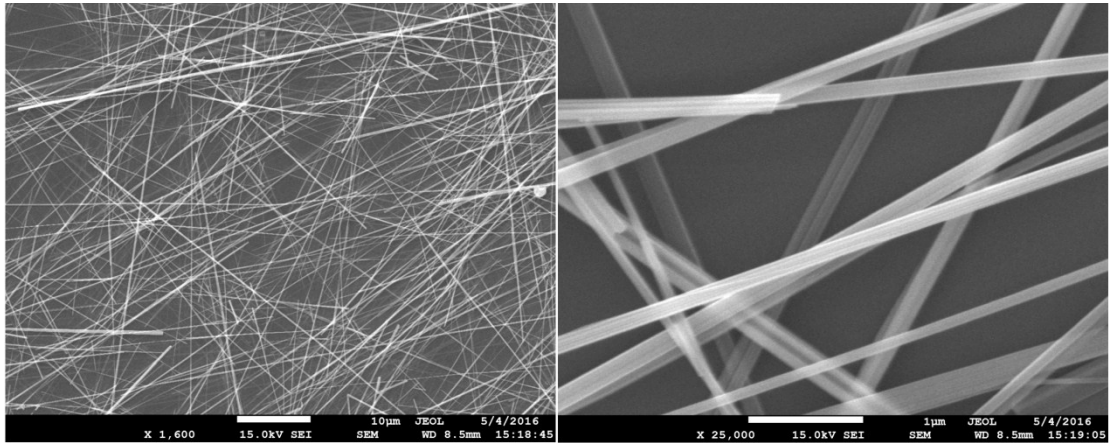

Fig. S1 SEM images of  $\alpha$ -MnO<sub>2</sub> nanowire

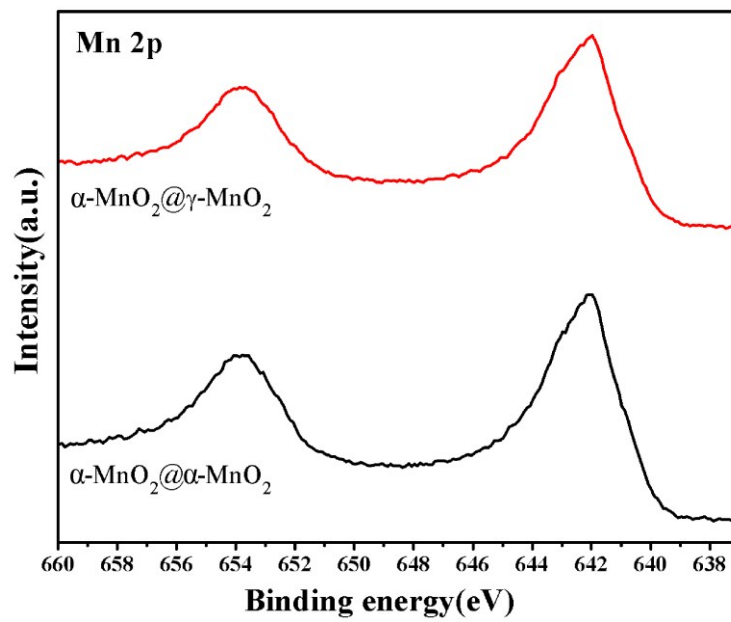

Fig.S2 Mn2p of the core/shell MnO<sub>2</sub>@MnO<sub>2</sub>.

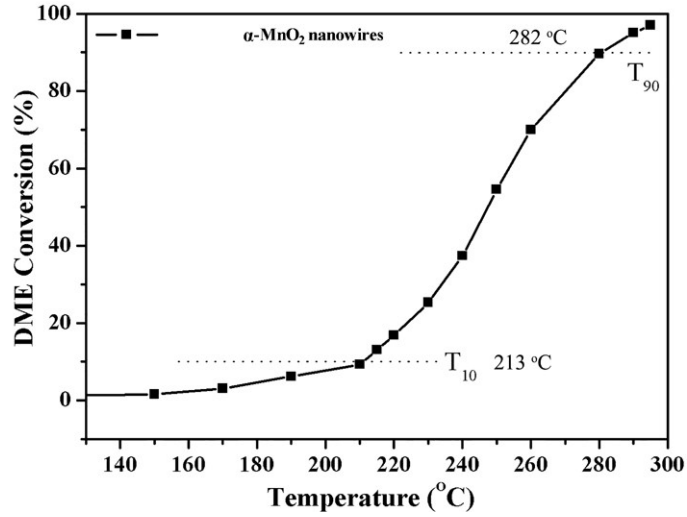

Fig.S3 the catalytic combustion activity of  $\alpha$ -MnO<sub>2</sub> nanowire. From the curve, we can see that the T<sub>10</sub> and T<sub>90</sub> of MnO<sub>2</sub> nanowire is higher than those of the MnO<sub>2</sub>@MnO<sub>2</sub>, demonstrating that it has poor activity.

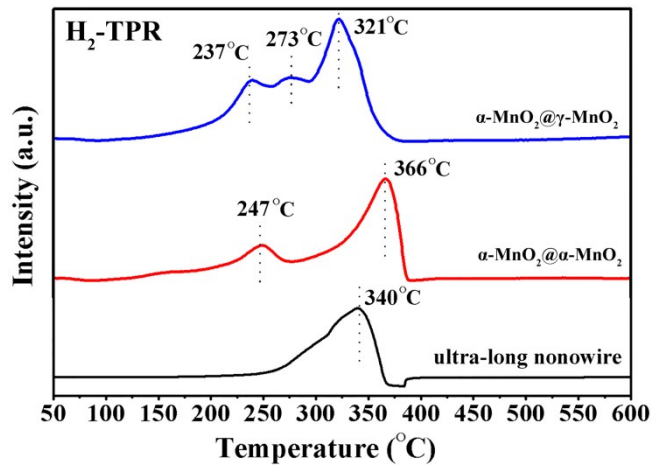

Fig.S4 TPR result of the MnO<sub>2</sub>@MnO<sub>2</sub> and MnO<sub>2</sub> nanowire. The MnO<sub>2</sub>@MnO<sub>2</sub> catalysts have higher reducibility than that of the backbone  $\alpha$ -MnO<sub>2</sub>, and this is attributed to the synergic effect of the core and shell MnO<sub>2</sub>.

Table S1 Some of the reported catalysts for DME combustion

| Catalyst                                                                          | T <sub>10</sub> /°C | T <sub>90</sub> /°C | Reference |
|-----------------------------------------------------------------------------------|---------------------|---------------------|-----------|
| $\alpha$ -MnO <sub>2</sub> @ $\gamma$ -MnO <sub>2</sub>                           | 171                 | 220                 | Our work  |
| CoFe <sub>2</sub> O <sub>4</sub>                                                  | ca.300              | ca.410              | 1         |
| 2PtAl                                                                             | 106                 | ca.310              | 2         |
| LaMnO <sub>3</sub>                                                                | 210                 | 295                 | 3         |
| Zn <sub>0.8</sub> Mn <sub>0.2</sub> Fe <sub>2.4</sub> O <sub>4</sub>              | 257                 | 276                 | 4         |
| BaNi <sub>0.8</sub> Mn <sub>0.2</sub> Al <sub>11</sub> O <sub>19</sub> - $\delta$ | 130                 | ca.340              | 5         |
| $\alpha$ -MnO <sub>2</sub>                                                        | 160                 | 172                 | 6         |
| Cu-OMS-2                                                                          | 171                 | 180                 | 7         |
| Ce-OMS-2                                                                          | 149                 | 159                 | 8         |

## Reference:

1. Z.-Y. Tian, P. Mountapmbeme Kouotou, A. El Kasmi, P. H. Tchoua Ngamou, K. Kohse-Höinghaus, H. Vieker, A. Beyer and A. Götzhäuser, *Proceedings of the Combustion Institute*, 2015, **35**, 2207-2214.
2. S. Colussi, A. Gayen, J. Llorca, C. de Leitenburg, G. Dolcetti and A. Trovarelli, *Industrial & Engineering Chemistry Research*, 2012, **51**, 7510-7517.
3. R. Dinamarca, C. Sepúlveda, E. J. Delgado, O. Peña, J. L. G. Fierro and G. Pecchi, *Journal of Catalysis*, 2016, **338**, 47-55.
4. Z. Beji, M. Sun, L. S. Smiri, F. Herbst, C. Mangeney and S. Ammar, *RSC Advances*, 2015, **5**, 65010-65022.
5. Q. Yu, L. Yu, Y. Wang, Q. Zhang, M. Sun, Y. Huang, Y. Lu and Z. Ge, *Chin. J. Chem. Eng.*, 2008, **16**, 389-393.
6. M. Sun, L. Yu, F. Ye, G. Diao, Q. Yu, Y. Zheng and J.-Y. Piquemal, *Mater. Lett.*, 2011, **65**, 3184-3186.
7. M. Sun, L. Yu, F. Ye, G. Diao, Q. Yu, Z. Hao, Y. Zheng and L. Yuan, *Chem. Eng. J.*, 2013, **220**, 320-327.
8. L. Yu, G. Diao, F. Ye, M. Sun, J. Zhou, Y. Li and Y. Liu, *Catal. Lett.*, 2010, **141**, 111-119.
